# Supplementary material
Source: Royal Society of Chemistry journal article supplement (doi:10.1039/d6nj01310d)
Supplement: d6nj01310d1.pdf [file d6nj01310d1.pdf]

Supplementary Information (SI) for New Journal of Chemistry.

This journal is (c) The Royal Society of Chemistry 2026

# Metal organic framework and doxorubicin co-encapsulated pH-responsive hydrogels against breast cancer through synergistic therapy

Liezhi Cao,<sup>a</sup> Qiang Gao,<sup>\*b</sup> Xiaoming Zuo,<sup>c</sup> Yong Kong<sup>\*a</sup> and Haiying Chen<sup>\*c</sup>

<sup>a</sup> Jiangsu Key Laboratory of Advanced Catalytic Materials and Technology, School of Petrochemical Engineering, Changzhou University, Changzhou 213164, China.

<sup>b</sup> Department of Radiology, The Affiliated Panyu Central Hospital, Guangzhou Medical University, Guangzhou 511400, China.

<sup>c</sup> Department of Pharmacy, Changzhou No.3 People's Hospital, Changzhou 213001, China.

\* Corresponding authors.

Email addresses: 630184926@qq.com (Q. Gao), yzkongyong@cczu.edu.cn (Y. Kong), 609776361@qq.com (H.Y. Chen).

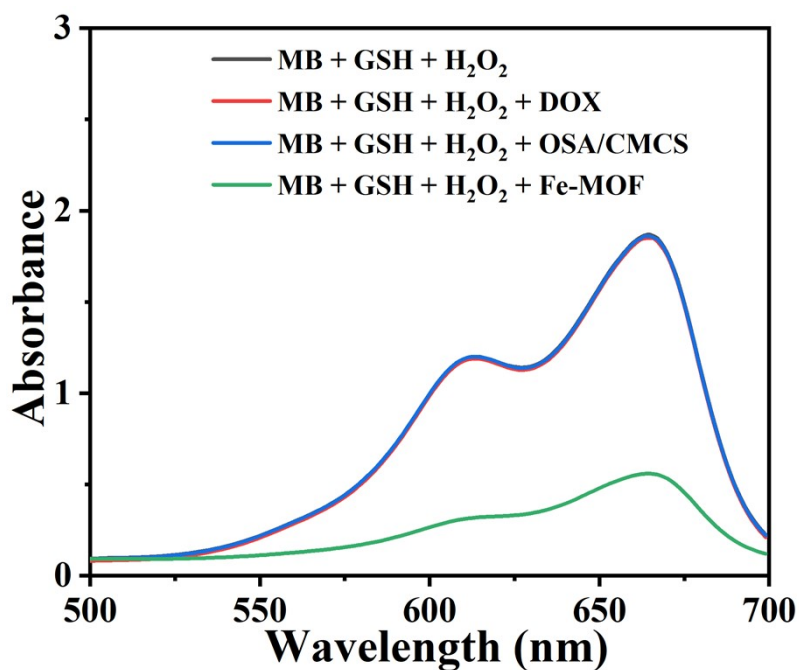

**Fig. S1** Visible spectra of 10 mM MB in the presence of DOX, OSA/CMCS and Fe-MOF at pH 5.0. The concentrations of H<sub>2</sub>O<sub>2</sub> and GSH are 100  $\mu$ M and 10 mM, respectively.

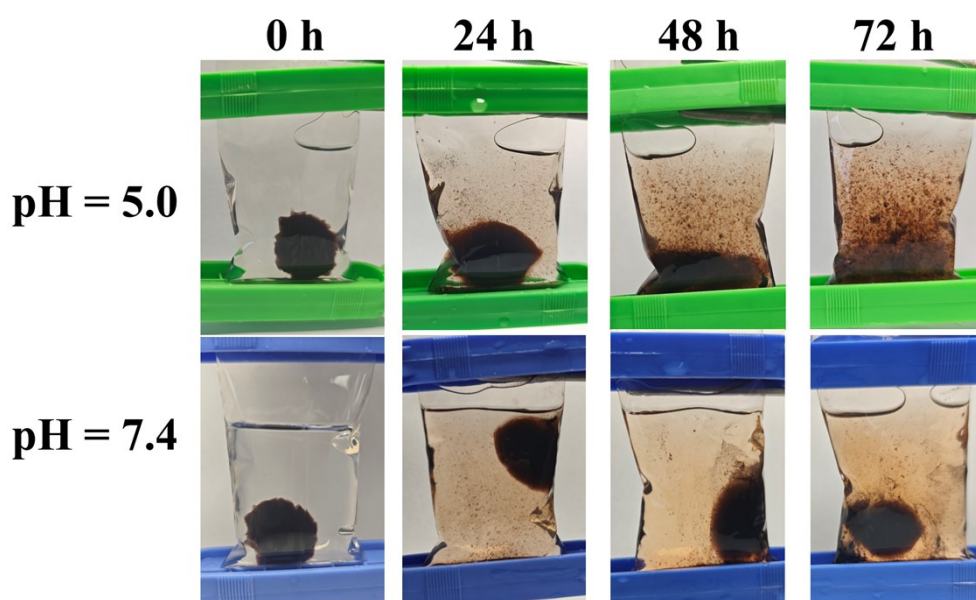

**Fig. S2** Photographs of Fe-MOF/DOX/OSA/CMCS hydrogels in PBS of 5.0 and 7.4 at specific time intervals.

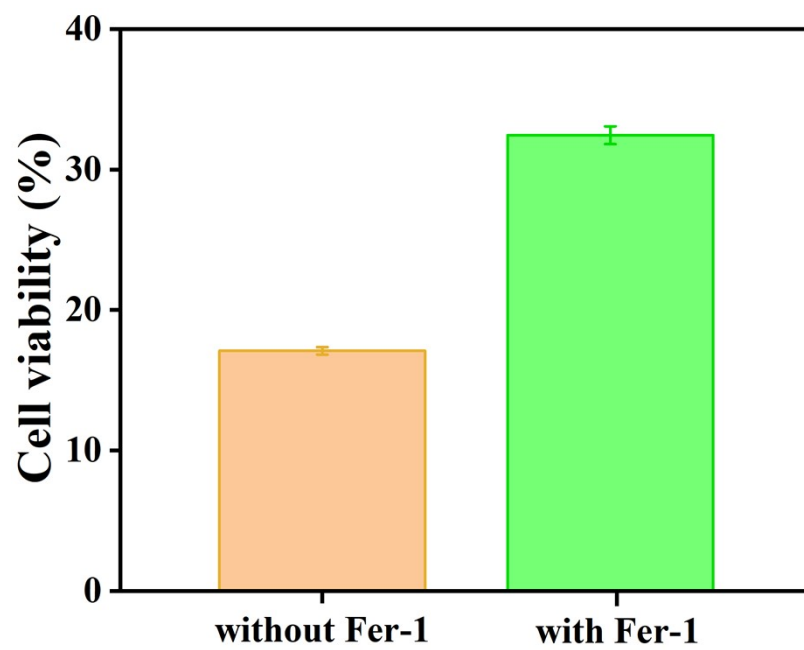

**Fig. S3** Cell viability of 4T1 cells treated with Fe-MOF/DOX/OSA/CMCS without and with Fer-1.
